# Supplementary material for: Membrane Chromatography-Based Downstream Processing for Cell-Culture Produced Influenza Vaccines
Source: MDPI journal article supplement (doi:10.3390/vaccines10081310), 2022-08-13
Supplement: s1 [file s1]

## Supplementary Materials

# Membrane Chromatography-Based Downstream Processing for Cell-Culture Produced Influenza Vaccines

Zeyu Yang <sup>1,†</sup>, Xingge Xu <sup>1,†</sup>, Cristina A. T. Silva <sup>1,2</sup>, Omar Farnos <sup>1</sup>, Alina Venereo-Sanchez <sup>1</sup>, Cécile Toussaint <sup>1</sup>, Shantoshini Dash <sup>1</sup>, Irene González-Domínguez <sup>1,‡</sup>, Alice Bernier <sup>1</sup>, Olivier Henry <sup>2</sup> and Amine Kamen <sup>1,\*</sup>

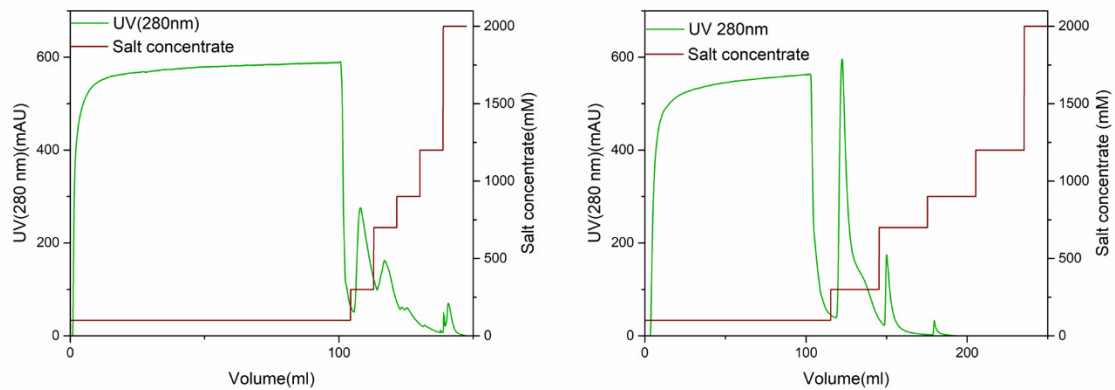

Figure S1. UV and salt concentration curves of Mustang® Q (left) and Sartobind® Q (Right) from AKTA.
